1  
2  
3  
4  
5  
6  
7  
8  
9  
10  
11  
12  
13  
14  
15  
16  
17  
18  
19  
20  
21  
22  
23  
24  
25  
26  
27  
28  
29  
30  
31  
32  
33  
34  
35  
36  
37

# Is artificial intelligence for medical professionals serving the patients?

Protocol for a mixed method systematic review on patient-relevant benefits and harms of algorithmic decision-making.

Christoph Wilhelm<sup>1, 2</sup>, christoph.wilhelm@fgw-brandenburg.de, 1<sup>st</sup> author (corresponding)  
Prof. Dr. Anke Steckelberg<sup>2</sup>, anke.steckelberg@medizin.uni-halle.de, co-author  
Dr. Felix G. Rebitschek<sup>1, 3</sup>, rebitschek@uni-potsdam.de, co-author

<sup>1</sup>Harding Center for Risk Literacy, Faculty of Health Sciences Brandenburg, University of Potsdam  
Virchowstr. 2, 14482 Potsdam, Germany

<sup>2</sup>Institute of Health and Nursing Science, Martin Luther University Halle-Wittenberg, Magdeburger  
Str. 8, 06112 Halle (Saale), Germany

<sup>3</sup>Max Planck Institute for Human Development, Lentzeallee 94, 14195 Berlin, Germany

## Contributions

Christoph Wilhelm conceptualised, developed the methodology and wrote this protocol. He is the guarantor of the Manuscript.

Prof. Dr. Anke Steckelberg validated the methodology of this protocol.

Dr. Felix G. Rebitschek conceptualised, reviewed, edited and supervised this protocol in clinical practice.

38  
39  
40  
41  
42  
43  
44  
45  
46  
47  
48  
49  
50  
51  
52  
53  
54  
55  
56  
57  
58  
59  
60  
61  
62  
63  
64  
65  
66  
67  
68  
69  
70  
71  
72  
73  
74  
75

## Abstract

### Background

Algorithmic decision making (ADM) utilizes algorithms to collect and process data and develop models to make or support decisions. Advances in artificial intelligence (AI) have led to the development of support systems that can be superior to medical professionals without AI support in certain tasks. However, whether patients can benefit from this remains unclear. The aim of this systematic review is to assess the current evidence on patient-relevant benefits and harms when healthcare professionals use ADM systems (developed using or working with AI) compared to healthcare professionals without AI-related ADM (standard care) - regardless of the clinical issues. Furthermore, for interpreting collected evidence and analysing preconditions for the implementation of AI-related ADM in healthcare, experts from research, practice, and regulation will be interviewed.

### Methods

Following the PRISMA statement and the MECIR standards for reporting systematic reviews, MEDLINE and PubMed (via PubMed), EMBASE (via Elsevier), IEEE Xplore, CENTRAL will be searched using English free text terms in title/abstract, Medical Subject Headings (MeSH) terms and Embase Subject Headings (Emtree) fields. Additional studies will be identified by contacting authors of included studies and through reference lists of included studies. Grey literature searches will be conducted in Google Scholar. Risk of bias will be assessed by using Cochrane's RoB 2 for randomised trials and ROBINS-I for non-randomised trials. Transparent reporting of the included studies will be assessed using the CONSORT-AI extension statement. Following the SRQR statement, semi-structured interviews will be conducted and analysed with the help of a qualitative content analysis according to Mayring. Based on the research questions and the findings of the systematic review, the study and interview guide will be developed a priori.

### Discussion

It is expected that there will be a substantial shortage of suitable studies that compare healthcare professionals with and without ADM systems concerning patient-relevant endpoints. This can be attributed to the prioritization of technical quality criteria and, in some cases, clinical parameters over patient-relevant endpoints in the development of study designs. Furthermore, it is anticipated that a significant portion of the identified studies will exhibit relatively poor methodological quality and provide only limited generalizable results.

### Systematic review registration

This study is registered within Prospero (CRD42023412156).

**Keywords:** Algorithmic decision making, ADM, artificial intelligence, patient relevant, healthcare professionals, decision support

## 76 Background

77 Artificial Intelligence (AI) is a broad term referring to the field of computer science that develops  
78 algorithms mimicking human cognitive functions such as learning, perception, problem-solving, and  
79 decision-making (McCarthy et al. 2006: 5-7). AI encompasses various approaches, including rule-based  
80 systems, machine learning (ML), deep learning, and many others. It comprises a range of technologies  
81 and techniques, including algorithmic decision-making (ADM) (Graili et al. 2021: 1). ADM refers to the  
82 process of using algorithms to gather, process and model input data to inform or make automated  
83 decisions. Feedback from these decisions can then be used by the system to improve itself (Araujo et  
84 al. 2020: 612). An ADM can take various forms depending on how it is framed and presented to the  
85 user or decision subject. It can be a simple algorithm that has been known and used for decades, such  
86 as classification trees (von Winterfeldt & Edwards 1986), or a more complex system like a  
87 recommender or AI that can provide recommendations to human decision-makers, nudge its users in  
88 a certain direction, or perform fully automated decision-making processes without human  
89 involvement (Araujo et al. 2020: 613). To sum up, artificial intelligent related algorithmic decision-  
90 making systems (AI-related ADM) are decision support systems that either apply AI (e.g., relying on ML  
91 models) or have been developed with the help of AI.

92 Recent advances in AI have resulted in the development of more complex and sophisticated systems  
93 that can outperform humans in certain tasks. One such example is AlphaZero, a deep learning  
94 algorithm developed by DeepMind, which uses reinforcement learning to learn how to play games like  
95 chess, shogi, and Go without being explicitly programmed. In fact, AlphaZero has convincingly beaten  
96 both human world champions and world champion computer applications in these games, simply by  
97 inputting the rules of the game (Silver et al. 2018: 3-4). Another notable AI system is ChatGPT,  
98 developed by OpenAI, which is a prototype text-based dialogue system that can generate human-like  
99 text and imitate writing essays and business plans (Hughes 2023). It can also analyse and write code in  
100 various programming languages, making it a valuable tool for debugging and code improvement  
101 (OpenAI 2023). Recently, ChatGPT was evaluated for its clinical reasoning ability by testing its  
102 performance on questions from the United States Medical Licensing Examination, where it scored at  
103 or near the passing threshold on all three exams without any special training or reinforcement (Kung  
104 et al. 2023).

105 These advances in AI seem to have enormous potential to transform many different fields and  
106 industries, which begs the question: will AI do so in healthcare?

107 In clinical trials, AI systems have already shown potential to help clinicians make better diagnoses (Bahl  
108 et al. 2018, Li et al. 2021), help personalise medicine and monitor patient care (Jiang et al. 2017, Ciervo  
109 et al. 2019), and contribute to drug development (Ekins et al. 2019). However, successful application  
110 in practice is limited (Panch et al. 2019: 77) and potential issues that may be responsible for this gap  
111 between research and practice should be revealed by our work.

112 By searching PubMed for the term "artificial intelligence", we found over 2,000 systematic reviews and  
113 meta-analyses published in the last 10 years, with a yearly increasing trend. These include several  
114 reviews conducted in the area of AI in healthcare that provide an overview of the current state of AI  
115 technologies in specific clinical areas, including AI systems for breast cancer diagnosis in screening  
116 programmes (Freeman et al. 2021), ovarian cancer (Xu et al. 2022), early detection of skin cancer (Jones  
117 et al. 2022), COVID-19 and other pneumonia (Jia et al. 2022), prediction of preterm birth (Akazawa &  
118 Hashimoto 2022), or diabetes management (Kamel et al. 2022). Other reviews have focused on  
119 comparing clinicians and AI systems in terms of their performance to show their capabilities in a clinical  
120 setting (Shen et al. 2019, Nagendran et al. 2020, Liu et al. 2019).

121 Although these reviews are crucial to the further development of AI systems, they offer little insight  
122 into whether patients actually benefit from their use by medical professionals. Indeed, these studies  
123 focus on the analytical performance of these systems, rather than on healthcare-related metrics. In  
124 most of the studies mentioned here, the underlying algorithms have been evaluated using a variety of  
125 parameters, such as the F1 score for error classification, balanced accuracy, false positive rate, and  
126 area under the receiver operating characteristic curve (AUROC). However, measures of a system's  
127 accuracy often provide non-replicable results (McDermot et al. 2021: 4), do not necessarily indicate  
128 clinical efficiency (Keane & Topol 2018: 1), AUROC does not necessarily indicate clinical applicability  
129 (Halligan et al. 2015: 935) and in fact, none of these measures reflect beneficial change in patient care  
130 (Brocklehurst et al. 2017: 1727, Shah et al. 2019: 1).

131 To summarise, as with any other new technology introduced into healthcare, the clinical effectiveness  
132 and safety of AI compared to the standard of care must be evaluated through properly designed  
133 studies to ensure patient safety and maximise benefits while minimising any unintended harm (Park  
134 et al. 2020: 328). Therefore, **a critical analysis of patient-relevant outcomes is needed, especially the  
135 benefits and harms of decisions informed by or made by AI systems.**

136 To this end, this review goes beyond previous studies in several ways. First, we study clinical AI systems  
137 that enable algorithmic decision making (AI-related ADM) in general and therefore do not limit  
138 ourselves to selected clinical problems. In particular, we focus on machine learning systems that infer  
139 rules from observations. Although we omit rule-based systems, we apply the term AI throughout our  
140 work because it is often incorrectly and redundantly used for ML and deep learning in the literature  
141 we study. Second, we focus on studies that report patient-relevant outcomes that, according to  
142 German Institute for Quality and Efficiency in Healthcare (IQWiG 2022: 44) describe, how patients feel,  
143 how they can perform their functions and activities or if they survive. These may include, for example,  
144 mortality, morbidity (with regard to complaints and complications), length of hospital stay,  
145 readmission, time to intervention and health-related quality of life. Third, we focus only on studies  
146 that compare medical professionals supported by AI-related ADM systems with medical professionals  
147 without AI-related ADM systems (standard care). By doing so, this review provides an overview of the  
148 current literature on clinical AI-related ADM systems, summarises the empirical evidence on their

149 benefits and harms for patients and highlights research gaps that need to be addressed in future  
150 studies.

151 If clinical AI systems are found to have a well-balanced benefit-to-harm ratio, their implementation  
152 into practice can be considered. However, effectively deploying these systems presents a separate  
153 frontier. Specific challenges that need to be addressed include, data privacy and security, usability and  
154 lack of algorithm transparency (e.g., in the case of proprietary systems), regulations and policies, the  
155 changing nature of healthcare work, the risk of harm from system errors, and at the individual level,  
156 physician and patient awareness, education, and trust in these systems (Choudhury et al. 2020: 3, He  
157 et al. 2019: 33, Yu et al. 2018: 720).

158 To outline these challenges and framework conditions, particularly in the German healthcare system,  
159 and to consider the empirical data collected in this review, **it is necessary to consult experts from**  
160 **various disciplines to use their experiences, knowledge, and perceptions of the benefits and risks of**  
161 **implementing AI-related ADM systems.** Therefore, we will bring together experts from institutions  
162 responsible for auditing the safety of AI systems, audit bodies that support implementation processes  
163 under scientific and regulatory conditions in the healthcare sector, and bodies that combine practical  
164 healthcare work and research with AI systems.

165

## 166 **Objectives**

167

168 The aim of this review is to systematically assess the current evidence on patient-relevant benefits and  
169 harms of ADM systems which are developed or used with AI (AI-related ADM) to support medical  
170 professionals compared to medical professionals without this support (standard care) (Study 1).  
171 Furthermore, we will elicit expert assessments of our findings and the benefits and risks of the  
172 implementation of AI-related ADM in healthcare, which they perceive (Study 2).

### 173 **Study 1, Systematic review:**

- 174 1. Are there studies that compare patient-relevant effectiveness of AI-related ADM for medical  
175 professionals compared to medical professionals without AI-related ADM?  
176 2. Do these studies show adequate methodological quality and are their findings generalisable?  
177 3. Can AI-related ADM systems help medical professionals to make better decisions in terms of  
178 benefits and harms for patients?

### 179 **Study 2, expert interviews:**

- 180 1. How do experts assess the overall benefit-to-harm ratio of identified AI-related ADM  
181 systems?  
182 2. In which medical area of competences (diagnosis, treatment, prognosis, prevention) would  
183 patients in Western healthcare systems particularly benefit from AI-related ADM systems?  
184 3. What are the consequences (e.g., side effects) of implementing AI-related ADM systems in  
185 healthcare?

- 186 4. What are the main challenges that hinder the implementation of AI-related ADM systems in  
187 clinical practice and what improvements could be suggested?  
188 5. What are the regulatory requirements for implementation of AI-related ADM systems in  
189 clinical practice?

190

## 191 **Methods/Design**

192

193 In accordance with the Preferred Reporting Items for Systematic Review and Meta-Analysis Protocols  
194 (PRISMA-P) statement (Moher et al. 2015), the study protocol for this systematic is registered on the  
195 International prospective register of systematic reviews (PROSPERO) database (CRD42023412156). If  
196 necessary, post-registration changes to the protocol, will be detailed under the PROSPERO record with  
197 an accompanying rationale.

198 To answer the research questions presented, a systematic review in mixed-method design will be  
199 conducted, which will be presented into two parts.

### 200 **Study 1: Systematic review**

201 We will follow the Preferred Reporting Items for Systematic Reviews and Meta-Analyses (PRISMA)  
202 statement (Page et al. 2021) and the Methodological Expectations of Cochrane Intervention Reviews  
203 (MECIR) standards (Higgins et al. 2021).

### 204 **Searches**

205 We will search systematically using English free text terms in title/abstract, Medical Subject Headings  
206 (MeSH) terms and Embase Subject Headings (Emtree) fields for various forms of keywords related to  
207 'artificial intelligence' and relevant subcategories of computer generated and processed decision-  
208 making algorithms, 'medical professionals' and keywords describing effectiveness parameters and  
209 outcomes as well as preferred study types. Based on the block building approach, keywords and terms  
210 are combined using the Boolean operators AND and OR and progressively checked for relevant hits.

### 211 **Databases to be used for searches**

212 MEDLINE and PubMed (via PubMed), EMBASE (via Elsevier), Institute of Electrical and Electronics  
213 Engineers (IEEE) Xplore, will be searched for peer-reviewed articles as well as ClinicalTrials.gov and  
214 ICTRP (via CENTRAL) for ongoing trials and protocols.

215 To reduce potential publication bias, additional studies will be identified by contacting authors of  
216 included studies, contacting experts in the field, and through reference lists of relevant studies. Grey  
217 literature searches will be conducted in Google Scholar. For this purpose, the keywords used in the  
218 systematic search will be used in different combinations, as well as their German equivalents. Google  
219 Scholar will be searched up to the 10th hit page. The detailed search strategy for each database will  
220 be reported under the PROSPERO record once the searches have been conducted.

221

222 **Search strategy**

223 We developed our search strategy using the PICOS scheme (Table 1).

224 **Table 1:** PICOS scheme

| Participants                                     | Intervention                                                                              | Control                                                                                                          | Outcome                             | Study Type                               |
|--------------------------------------------------|-------------------------------------------------------------------------------------------|------------------------------------------------------------------------------------------------------------------|-------------------------------------|------------------------------------------|
| Human patients without restriction in age or sex | Medical professionals supported by an AI-related ADM system applied to a clinical problem | Medical professionals applied to a clinical problem, without support by an AI-related ADM system (standard care) | Patient relevant benefits and harms | Interventional and observational studies |

225 While doing preliminary searches for basic literature in Medline and PubMed (via PubMed), we noticed  
226 that study conductors from different scientific fields (e.g., computer scientists) used different terms  
227 for the intervention outcomes we were looking for. In addition, some studies were not indexed  
228 appropriately in PubMed, which complicated our initial search strategy. To carry out the search  
229 strategy, we have created and tested the blocks consecutively to gather the best results from each  
230 block, expanding and narrowing the search strategy. To assess the right direction of the search  
231 strategy, we have used fundamental literature, such as Choudhury & Asan 2020, Park et al. 2020 and  
232 Nagendran et al. 2020 as test sets, making sure the results of our search had common ground with  
233 these studies.

234 The resulting search string for Medline and PubMed in the individual blocks can be found in table 2  
235 and describes the basis for other databases.

236

237

238

239

240

241

242

243

244

245

246

247 **Table 2:** Search string blocks for Medline and PubMed (via PubMed)

|                                                         |                                                                                                                                                                                                                                                                                                                                                                                                                                                                                                                                                                                                                                                                                                                                                                                                                                                                                                                                                                                                                                                                                                                                                                                                                                                                                                                                                                                                                                                                                                                                                                                                                   |
|---------------------------------------------------------|-------------------------------------------------------------------------------------------------------------------------------------------------------------------------------------------------------------------------------------------------------------------------------------------------------------------------------------------------------------------------------------------------------------------------------------------------------------------------------------------------------------------------------------------------------------------------------------------------------------------------------------------------------------------------------------------------------------------------------------------------------------------------------------------------------------------------------------------------------------------------------------------------------------------------------------------------------------------------------------------------------------------------------------------------------------------------------------------------------------------------------------------------------------------------------------------------------------------------------------------------------------------------------------------------------------------------------------------------------------------------------------------------------------------------------------------------------------------------------------------------------------------------------------------------------------------------------------------------------------------|
| <p><b>Block 1,</b><br/>artificial<br/>intelligence:</p> | <p>(("artificial intelligence"[MeSH Terms] OR "artificial intelligence"[Title/Abstract] OR "artificial-intelligence"[Title/Abstract] OR "machine learning"[Title/Abstract] OR "machine-learning"[Title/Abstract] OR "hierarchical learning"[Title/Abstract] OR "computational intelligence"[Title/Abstract] OR "machine intelligence"[Title/Abstract] OR "computer reasoning"[Title/Abstract] OR "deep learning"[Title/Abstract] OR "supervised learning"[Title/Abstract] OR "unsupervised learning"[Title/Abstract] OR "reinforcement learning"[Title/Abstract] OR "representation learning"[Title/Abstract] OR "natural language processing"[Title/Abstract] OR "large language model*"[Title/Abstract] OR "generative model*"[Title/Abstract] OR "representation learning"[Title/Abstract] OR ("knowledge acquisition"[Title/Abstract] AND "computer"[Title/Abstract]) OR ("knowledge representation"[Title/Abstract] AND "computer"[Title/Abstract]) OR "image recognition"[Title/Abstract] OR "machine vision"[Title/Abstract] OR "computer vision"[Title/Abstract] OR "algorithmic decision"[Title/Abstract]))</p>                                                                                                                                                                                                                                                                                                                                                                                                                                                                                          |
| <p><b>Block 2,</b><br/>medical<br/>professionals:</p>   | <p>AND ("expert"[Title/Abstract] OR "experts"[Title/Abstract] OR "medical professional"[Title/Abstract] OR "medical professionals"[Title/Abstract] OR "medical doctor*"[Title/Abstract] OR "physician*"[Title/Abstract] OR "clinician*"[Title/Abstract] OR "general practitioner*"[Title/Abstract] OR "health care professional"[Title/Abstract] OR "health care professionals"[Title/Abstract] OR "healthcare professional"[Title/Abstract] OR "healthcare professionals"[Title/Abstract] OR "nurse"[Title/Abstract] OR "nurses"[Title/Abstract] OR ("therapist"[Title/Abstract] OR "therapists"[Title/Abstract]) OR ("health"[Title/Abstract] AND "alert system"[Title/Abstract]) OR ("medical"[Title/Abstract] AND "alert system"[Title/Abstract]) OR ("practice"[Title/Abstract] AND "alert system"[Title/Abstract]) OR ("hospital"[Title/Abstract] AND "alert system"[Title/Abstract]) OR ("clinic*"[Title/Abstract] AND "alert system"[Title/Abstract]) OR ("health"[Title/Abstract] AND "decision support"[Title/Abstract]) OR ("medical"[Title/Abstract] AND "decision support"[Title/Abstract]) OR ("practice"[Title/Abstract] AND "decision support"[Title/Abstract]) OR ("hospital"[Title/Abstract] AND "decision support"[Title/Abstract]) OR ("clinic*"[Title/Abstract] AND "decision support"[Title/Abstract]) OR ("health"[Title/Abstract] AND "warning system"[Title/Abstract]) OR ("medical"[Title/Abstract] AND "warning system"[Title/Abstract]) OR ("practice"[Title/Abstract] AND "warning system"[Title/Abstract]) OR ("clinic*"[Title/Abstract] AND "warning system"[Title/Abstract]))</p> |
| <p><b>Block 3,</b><br/>outcomes:</p>                    | <p>AND ("effectiveness"[Title/Abstract] OR "effectivity"[Title/Abstract] OR "benefit"[Title/Abstract] OR "benefits"[Title/Abstract] OR "harm"[Title/Abstract] OR "harms"[Title/Abstract] OR "adverse event*"[Title/Abstract] OR "mortality"[Title/Abstract] OR "morbidity"[Title/Abstract] OR "length of hospital stay"[Title/Abstract] OR "readmission"[Title/Abstract] OR "time to intervention"[Title/Abstract] OR "health-related quality of life"[Title/Abstract] OR "endpoint*"[Title/Abstract] OR "outcome*"[Title/Abstract])</p>                                                                                                                                                                                                                                                                                                                                                                                                                                                                                                                                                                                                                                                                                                                                                                                                                                                                                                                                                                                                                                                                          |
| <p><b>Block 4,</b><br/>study types:</p>                 | <p>AND ("randomised" OR "randomized" OR "RCT" OR "clinical trial*" OR "cohort" OR "observational study" OR "observational design*" OR "case-control" OR "experiment*" OR "retrospective study" OR "retrospective design*" OR "prospective study" OR "prospective design*" OR "non-inferiority" OR "phase* study" OR "intervention study" OR "diagnostic study" OR "pre-post study" OR "pre post study" OR "pre-post design" OR "pre post design")</p>                                                                                                                                                                                                                                                                                                                                                                                                                                                                                                                                                                                                                                                                                                                                                                                                                                                                                                                                                                                                                                                                                                                                                             |
| <p>Filter:</p>                                          | <p>AND (humans[filter])<br/>AND (y_10[filter])</p>                                                                                                                                                                                                                                                                                                                                                                                                                                                                                                                                                                                                                                                                                                                                                                                                                                                                                                                                                                                                                                                                                                                                                                                                                                                                                                                                                                                                                                                                                                                                                                |

## 249 **Types of studies to be included**

250 For the systematic search peer reviewed interventional and observational studies published in German  
251 or English, 10 years retrospectively from the date of the search will be considered. For the search of  
252 grey literature, scientific reports published in German or English 10 years retrospectively from the date  
253 of the search will be considered. To extract potentially relevant studies from (systematic) reviews and  
254 meta-analyses, secondary studies will be gathered and screened. However, secondary studies will not  
255 be included in the synthesis.

256 In contrast to studies of effectiveness and safety, pure efficacy studies (e.g., focusing on algorithms  
257 accuracy) will be excluded as these outcomes are not directly relevant for patients. Patient-relevant  
258 outcomes will be defined according to the IQWiG method paper (2022). In addition, studies that used  
259 AI systems beyond our scopes, such as robotics (systems that support the implementation of decisions)  
260 will be excluded. Editorials, commentaries, letters, and other informal publication types will be  
261 excluded as well.

262 We will provide a list of all references screened in full text including exclusion reasons in the appendix  
263 of the final study.

## 264 **Participants**

265 Our study is focusing on human patients without restriction of age or sex. Therefore, the input data  
266 for the algorithms must include real human data gathered either during routine care and saved for use  
267 in research or generated specifically for the individual study.

## 268 **Intervention**

269 Our study is focusing on medical professionals utilizing an AI-related ADM system to address a clinical  
270 problem.

271 In our working definition, a medical professional is a qualified individual who has the authority to  
272 perform necessary medical procedures within their professional scope of practice. Their goal is to  
273 improve, maintain, or restore the health of individuals by examining, diagnosing, prognosticating,  
274 and/or treating clinical problems. This may include medical doctors, registered nurses, and other  
275 medical professionals. Clinical problems can encompass illnesses, injuries, and physical or mental  
276 disorders, among other conditions.

277 In our working definition, an AI-related ADM system is a clinical decision support system that either  
278 apply AI (e.g., relying on ML models) or that has been developed with the help of AI. Clinical decision  
279 support models without any involvement of AI will be excluded.

## 280 **Control**

281 Medical professionals, as described in the working definition, are addressing a clinical problem without  
282 the support of an AI-related ADM system (standard care).

283 **Outcomes**

284 Patient-relevant benefits and harms, according to the IQWiG method paper (2022), are gathered.  
285 These may include, for example, mortality, morbidity (with regard to complaints and complications),  
286 length of hospital stay, readmission, time to intervention and health-related quality of life.

287 **Study types**

288 We will collect both interventional and observational studies, which may encompass randomised  
289 controlled trials, cohort studies, case-control studies, randomised surveys, retrospective and  
290 prospective studies, phase studies, as well as non-inferiority or diagnostic studies.

291 **Data extraction**

292 Records arising from the literature search will be stored in the citation manager Citavi 6 (c) Swiss  
293 Academic Software. After removing duplicates, two reviewers will independently review all titles and  
294 abstracts via the browser application Rayyan (Ouzzani et al. 2016). Studies potentially meeting the  
295 inclusion criteria will then be screened in full text independently by two reviewers. Disagreements over  
296 eligibility of studies will be discussed and, if necessary, resolved by a third reviewer. Authors of the  
297 included studies will be contacted if clarification of their data or study methods is required. The  
298 PRISMA 2020 flow diagram (Page et al. 2021) will be used to keep the study selection process  
299 transparent.

300 Using a standardised data collection form, two reviewers will extract data independently from the  
301 included studies and will compare them for discrepancies. Missing data will be requested from study  
302 authors. Extracted data will include the following (Table 3).

303

304

305

306

307

308

309

310

311

312

313 **Table 3:** Study data to be extracted

| Table/ Item                                         | Example                                                                                                                          |
|-----------------------------------------------------|----------------------------------------------------------------------------------------------------------------------------------|
| <b>Study characteristics</b>                        |                                                                                                                                  |
| Reference, registration                             | Meier, 2022                                                                                                                      |
| Country of conduction                               | Germany                                                                                                                          |
| Setting                                             | Hospital                                                                                                                         |
| Study design                                        | RCT                                                                                                                              |
| Observation duration                                | January 2017 until September 2018                                                                                                |
| Medical specialty                                   | Intensive care unit (ICU)                                                                                                        |
| Prediction/ classification goal of AI-related ADM   | Sepsis                                                                                                                           |
| Patient-relevant outcome                            | Mortality, length of hospital stay                                                                                               |
| Intervention procedure/ instrument                  | ICU bedside monitors with recommender                                                                                            |
| comparison procedure/ instrument                    | ICU bedside monitors without recommender                                                                                         |
| Study funding                                       | No funding                                                                                                                       |
| <b>Characteristics of the evaluation population</b> |                                                                                                                                  |
| Patient population                                  |                                                                                                                                  |
| Inclusion criteria                                  | Participants age over 18 under 64                                                                                                |
| Exclusion criteria                                  | Pre-existing septic shock                                                                                                        |
| Mean age (SD)                                       | 49.8 (1.55)                                                                                                                      |
| Population total (share of sex in %)                | N=75 (n=30 females)                                                                                                              |
| Medical professional population                     |                                                                                                                                  |
| Inclusion criteria                                  | ICU Physician, trained in used AI-related ADM system                                                                             |
| Exclusion criteria                                  | Physician at ICU for less than 2 years                                                                                           |
| Mean age (SD)                                       | 45.0 (3.5)                                                                                                                       |
| Population total (share of sex in %)                | N=6 (n=3 females)                                                                                                                |
| <b>Characteristics of used algorithm</b>            |                                                                                                                                  |
| Algorithm name                                      | ResNet-18                                                                                                                        |
| Algorithm architecture                              | Convolutional neural network (CNN)                                                                                               |
| Data source                                         | In house digital medical records, monitoring data                                                                                |
| Development                                         | Laboratory and health metrics (HR, RR, SpO2, etc.) of n=677 cases (n=220 females)                                                |
| Validation                                          | Internal: random split sample, external: no                                                                                      |
| <b>Risk of bias assessment (RoB 2/ ROBINS-I)</b>    |                                                                                                                                  |
| <b>Reporting assessment (CONSORT-AI)</b>            |                                                                                                                                  |
| <b>Study Results</b>                                |                                                                                                                                  |
| Supported decision                                  | Initiation of life-saving measures, hospital discharge                                                                           |
| Patient benefit (effect size)                       | Reduction length of hospital stay: 2.3 days<br>Mortality rate reduction: 12/100 patients<br>Reduction length of stay ICU: 0 days |
| Patient harm (effect size)                          | Not reported                                                                                                                     |
| Other effects                                       | Not reported                                                                                                                     |
| <b>Assessment for clinical use</b>                  |                                                                                                                                  |
| Implementation status                               | Not implemented                                                                                                                  |
| Author's restrictions on clinical use               | System requires more training and testing                                                                                        |
| Author's recommendation on clinical use             | Not mentioned                                                                                                                    |

## 315 **Risk of bias and quality assessment**

316 Risk of bias will be assessed by using the revised Cochrane risk-of-bias tool for randomized trials (RoB  
317 2) (Sterne et al. 2019) and the risk-of-bias in non-randomized studies for interventions (ROBINS-I) tool  
318 (Sterne et al. 2017). Disagreements between the authors over the risk of bias in the included studies  
319 will be resolved by discussion, or with involvement of a third author if necessary. Transparent reporting  
320 of the included studies will be assessed through the Consolidated Standards of Reporting Trials  
321 interventions involving Artificial Intelligence (CONSORT-AI) extension by Liu et al. (2020). The  
322 CONSORT-AI extension includes 14 new items that were considered sufficiently important for AI  
323 interventions to be routinely reported in addition to the core CONSORT items by Schulz et al. (2010).  
324 CONSORT-AI aims to improve the transparency and completeness in reporting clinical trials for AI  
325 interventions. It will assist to understand, interpret, and critically appraise the quality of clinical trial  
326 design and risk of bias in the reported outcomes.

## 327 **Data synthesis**

328 Given the expected likelihood of heterogeneity between studies in the different medical specialties in  
329 terms of outcome measures, study designs and interventions, we do not know if performing a meta-  
330 analysis will be possible. However, a systematic narrative synthesis will be provided of the results with  
331 an overview of the relevant effects for the outcomes, with information presented in the text and tables  
332 to summarise and explain the characteristics and findings of the included studies. The measures will  
333 be presented in absolute risks and risk differences. Studies of unclear or high risk of bias will not be  
334 excluded, as the authors assume that most potentially relevant studies will be of low methodological  
335 quality. This is also reported in recent reviews that examine the methodological quality of machine  
336 learning systems in the clinical setting (e.g., Nagendran et al. 2020). Nevertheless, the influence of the  
337 potential biases on the results will be discussed.

338 In addition to the synthesis through Study 1, the results of this review will be discussed with experts  
339 (Study 2) and presented in the text.

## 340 **Study 2: Expert interviews**

341 In order to meet the study objectives, and considering the findings of Study 1, we elicit experts'  
342 experiences, knowledge, and their perceived benefits and risks of implementing AI-related ADM  
343 systems. By doing so, we hope to gain a practice-related understanding of the findings of Study 1 and  
344 identify barriers and needs regarding future research questions.

345 Based on the research questions and the findings of Study 1, the study and interview guide will be  
346 developed a priori. The study design and the interview guide will be submitted to the ethics committee  
347 of the University of Potsdam and pre-registered within the PROSPERO protocol for the systematic  
348 review. If necessary, post-registration changes to the protocol will be detailed and justified in the  
349 PROSPERO protocol. To ensure transparency of the qualitative research part of our review, we will  
350 follow the Standards for Reporting Qualitative Research (SRQR) (O'Brien et al. 2014).

## 351 **Study design**

352 We will conduct semi-structured interviews. To analyse the interviews, we will use qualitative content  
353 analysis according to Mayring (2020). This systematic and rule-based approach will ensure that the  
354 analysis is understandable, comprehensible, and verifiable by others.

## 355 **Data collection**

356 As our interview study aims to understand the practical implications of the findings of Study 1, we will  
357 use a purposive sampling strategy to select at least 3 interviewees according to their expertise through  
358 their function, profession, practice, and research in relation to the research questions (Mey & Mruck  
359 2020: 322, Schreier 2020: 24). Therefore, we will combine experts of the following types: Auditing  
360 bodies responsible for auditing AI systems for safety (e.g., TÜV NORD IT Secure Communications GmbH  
361 & Co. KG), auditing bodies that support implementation procedures under scientific and regulatory  
362 conditions in the healthcare sector (e.g., VDI/VDE Innovation + Technik GmbH), and institutions that  
363 combine practical healthcare-related work and research with AI systems (e.g., Berlin Institute of Health  
364 at Charité Berlin). The experts will be recruited on the basis of publications, via professional networks,  
365 and by sending inquiries to the relevant organisations and institutions. Once relevant experts will have  
366 been identified, they will be contacted via e-mail or phone, informing about the specific research  
367 questions, and showing some exemplary findings from Study 1, to ask for participation and to set the  
368 scope of the interview. There is no reimbursement planned for the experts who participate in the  
369 interview.

370 Written informed consent will be obtained prior to each interview and participants will be fully  
371 informed in writing and verbally about the purpose, risks, and scope of the study.

372 Approximately one week prior to the interview, participants will be presented with the key findings of  
373 Study 1 and the interview guide, which they will be asked about in the interview. In addition to the  
374 questions on research interest, descriptive data will be collected on field of activity, specific expertise,  
375 organisation, length of involvement in the topic, as well as age and gender of the respective  
376 interviewee. Interviews should not exceed 45 minutes. All interviews will be audio recorded and  
377 automatically transcribed verbatim using Adobe Premiere Pro 2023 (version 23.1.0). The automated  
378 transcripts will be corrected manually by the interviewer.

379 Throughout the data collection process, the interviewer will keep a research diary to record initial  
380 impressions immediately after each interview and to encourage reflexivity about how their role in the  
381 researcher-participant relationship might influence the data collection process (Mayring 2020: 12).

## 382 **Data analysis and extraction**

383 The transcripts and notes from the research diary will be transferred to the relevant memos of each  
384 transcript in MAXQDA Plus 2022 (version 22.2.0). All data analysis will be carried out by two  
385 independent researchers to ensure rigour and trustworthiness. In the event of disagreement between

386 the two researchers on coding, we will revisit the data to develop a shared understanding of the  
387 consistent interpretations. The interviews will be analysed using qualitative content analysis according  
388 to Mayring (2020). The main categories will initially be developed deductively from the interview guide,  
389 which will be developed from the findings of Study 1. Additional major categories will be developed  
390 inductively from the data. The final code system, including illustrative interview quotes, will be part of  
391 the scientific publication. For this purpose, extracts from the transcript will be translated into English  
392 after coding, if necessary.

### 393 **Data management, data storage and data privacy**

394 After being contacted by the interviewer via phone or e-mail, the experts will receive all relevant study  
395 documents via mail or e-mail. Verbal consent to receive the study documents will be obtained by  
396 phone or e-mail, and written consent will be obtained in the consent form before the interview takes  
397 place. All participants will be assured of confidentiality, anonymity of data, and the right to withdraw  
398 from the study or skip questions without negative consequences. Individual contact details will be  
399 stored on the interviewer's password-protected computer until the time of the interview. Contact  
400 details will be deleted immediately after the interview. The audio recording is used only for quality  
401 assurance and will be deleted immediately after it is transcribed and compared. Transcripts will be  
402 pseudonymised by changing personal characteristics (such as names and addresses) and personal data,  
403 i.e., data that make indirect identification possible (e.g., places or institutions) to pseudonyms.

404

## 405 **Discussion**

406

407 It is to be expected that there is a significant lack of suitable studies comparing healthcare professionals  
408 with and without AI-related ADM systems regarding patient-relevant outcomes. It is assumed that this  
409 is due to, first, the lack of approval regulations for AI systems, second, the prioritisation of technical  
410 and clinical parameters over patient-relevant outcomes in the development of study designs, and,  
411 third, the prioritisation of AI for supporting clinical processes (e.g., administration). In addition, it is to  
412 be expected that a large proportion of the studies to be identified are of rather poor methodological  
413 quality and provide results that are rather difficult to generalise. Although reporting guidelines such as  
414 the Consolidated Standards of Reporting Trials (CONSORT) Statement (Schulz et al. 2010) are well-  
415 known and widely used in medical and public health research, they do not necessarily correspond to  
416 the novel protocol and study designs that are relevant for the assessment of the research questions  
417 relevant here. The extension of the Reporting Guidelines for Clinical Study Reports of Interventions  
418 Using Artificial Intelligence (CONSORT-AI) (Liu et al. 2020) may fill the gap but this guideline is relatively  
419 new and not necessarily always applied.

420 Engaging in discussions with experts from AI safety audit organizations, healthcare implementation  
421 audit bodies, and institutions bridging healthcare practice and AI research, we will gain valuable  
422 insights into the implications of study 1's findings (e.g., explanations for limited patient-relevant

423 studies). Additionally, these discussions will illuminate the challenges and opportunities associated  
424 with the integration of AI-related ADM systems in healthcare practice and enlighten their benefits and  
425 harms for patients.

426

427

428

429

430

431

432

433

434

435

436

437

438

439

440

441

442

443

444

445

446

447

448

449

450

## 451 **List of abbreviations**

452

|     |            |                                                                              |
|-----|------------|------------------------------------------------------------------------------|
| 453 | ADM        | Algorithmic Decision Making.                                                 |
| 454 | AI         | Artificial Intelligence.                                                     |
| 455 | AUROC      | Area Under the Receiver Operating Characteristic Curve.                      |
| 456 | CENTRAL    | Cochrane Central Register of Controlled Trials.                              |
| 457 | CNN        | Convolutional Neural Network.                                                |
| 458 | CONSORT    | Consolidated Standards of Reporting Trials.                                  |
| 459 | CONSORT-AI | Consolidated Standards of Reporting Trials for Artificial Intelligence.      |
| 460 | CRD        | Centre for Reviews and Dissemination.                                        |
| 461 | EMTREE     | Embase subject headings.                                                     |
| 462 | HR         | Heart Rate.                                                                  |
| 463 | ICU        | Intensive Care Unit.                                                         |
| 464 | IEEE       | Institute of Electrical and Electronics Engineers                            |
| 465 | IQWiG      | German Institute for Quality and Efficiency in Healthcare.                   |
| 466 | MECIR      | Methodological Expectations of Cochrane Intervention Reviews.                |
| 467 | MeSH       | Medical Subject Headings.                                                    |
| 468 | ML         | Machine Learning.                                                            |
| 469 | nRCT       | non Randomized Controlled Trial.                                             |
| 470 | PICO       | Participants, Intervention, Control, Outcome.                                |
| 471 | PRISMA     | Preferred Reporting Items for Systematic Review and Meta-Analysis.           |
| 472 | PRISMA-P   | Preferred Reporting Items for Systematic Review and Meta-Analysis Protocols. |
| 473 | PROSPERO   | International Prospective Register of Systematic Reviews.                    |
| 474 | RCT        | Randomized Controlled Trial.                                                 |
| 475 | ResNet-18  | A convolutional neural network that is 18 layers deep.                       |
| 476 | RoB 2      | Revised Cochrane Risk-of-Bias Tool for randomized trials.                    |
| 477 | ROBINS-I   | Risk-of-Bias in non-randomized studies for interventions.                    |

|     |      |                                               |
|-----|------|-----------------------------------------------|
| 478 | RR   | Respiratory Rate.                             |
| 479 | SD   | Standard Deviation.                           |
| 480 | SpO2 | Oxygen Saturation.                            |
| 481 | SRQR | Standards for Reporting Qualitative Research. |
| 482 |      |                                               |
| 483 |      |                                               |
| 484 |      |                                               |
| 485 |      |                                               |
| 486 |      |                                               |
| 487 |      |                                               |
| 488 |      |                                               |
| 489 |      |                                               |
| 490 |      |                                               |
| 491 |      |                                               |
| 492 |      |                                               |
| 493 |      |                                               |
| 494 |      |                                               |
| 495 |      |                                               |
| 496 |      |                                               |
| 497 |      |                                               |
| 498 |      |                                               |
| 499 |      |                                               |
| 500 |      |                                               |
| 501 |      |                                               |
| 502 |      |                                               |
| 503 |      |                                               |
| 504 |      |                                               |
| 505 |      |                                               |
| 506 |      |                                               |
| 507 |      |                                               |
| 508 |      |                                               |

509 **Declarations**

510

511 **Ethics approval and consent to participate**

512 Ethical approval for this study was obtained from the Ethics Committee of the University of Potsdam  
513 (103/2023).

514

515 **Consent for publication**

516 Not applicable.

517

518 **Availability of data and materials**

519 Not applicable.

520

521 **Competing interests**

522 The authors declare that they have no competing interests.

523

524 **Funding**

525 This research does not receive any funding.

526

527 **Acknowledgements**

528 Not applicable

529

530

531

532

533

534

535

536

## 537 **References**

538

539 Akazawa M, Hashimoto K. Prediction of preterm birth using artificial intelligence: a systematic  
540 review. *J Obstet Gynaecol.* 2022 Aug;42(6):1662-1668. doi:  
541 10.1080/01443615.2022.2056828.

542 Araujo T, Helberger N, Kruikemeier S, de Vreese CH. In AI we trust? Perceptions about automated  
543 decision-making by artificial intelligence. *AI & Soc* 35, 611–623 (2020). doi: 10.1007/s00146-  
544 019-00931-w.

545 Bahl M, Barzilay R, Yedidia AB, Locascio NJ, Yu L, Lehman CD. High-Risk Breast Lesions: A Machine  
546 Learning Model to Predict Pathologic Upgrade and Reduce Unnecessary Surgical Excision.  
547 *Radiology.* 2018 Mar;286(3):810-818. doi: 10.1148/radiol.2017170549.

548 Brocklehurst P, Field D, Greene K, Juszczak E, Keith R, Kenyon S, et al. Computerised interpretation of  
549 fetal heart rate during labour (INFANT): a randomised controlled trial. *Lancet.*  
550 2017;389:1719–29. doi: 10.1016/s0140-6736(17)30568-8.

551 Choudhury A, Asan O. Role of Artificial Intelligence in Patient Safety Outcomes: Systematic Literature  
552 Review. *JMIR Med Inform.* 2020 Jul 24;8(7):e18599. doi: 10.2196/18599.

553 Ciervo J, Shen SC, Stallcup K, Thomas A, Farnum MA, Lobanov VS, Agrafiotis DK. A new risk and issue  
554 management system to improve productivity, quality, and compliance in clinical trials. *JAMIA*  
555 *Open.* 2019 Mar 19;2(2):216-221. doi: 10.1093/jamiaopen/ooz006.

556 Ekins S, Puhl AC, Zorn KM, Lane TR, Russo DP, Klein JJ, Hickey AJ, Clark AM. Exploiting machine  
557 learning for end-to-end drug discovery and development. *Nat Mater.* 2019 May;18(5):435-  
558 441. doi: 10.1038/s41563-019-0338-z.

559 EQUATOR. Enhancing the QUALity and Transparency Of health Research. 2021. [http://www.equator-](http://www.equator-network.org)  
560 [network.org](http://www.equator-network.org). Accessed 21 November 2023.

561 Freeman K, Geppert J, Stinton C, Todkill D, Johnson S, Clarke A, Taylor-Phillips S. Use of artificial  
562 intelligence for image analysis in breast cancer screening programmes: systematic review of  
563 test accuracy. *BMJ.* 2021 Sep 1;374:n1872. doi: 10.1136/bmj.n1872.

564 Graili P, Ieraci L, Hosseinkhah N, Argent-Katwala M. Artificial intelligence in outcomes research: a  
565 systematic scoping review. *Expert Rev Pharmacoecon Outcomes Res.* 2021 Aug;21(4):601-  
566 623. doi: 10.1080/14737167.2021.1886083.

567 Halligan S, Altman DG, Mallett S. Disadvantages of using the area under the receiver operating  
568 characteristic curve to assess imaging tests: a discussion and proposal for an alternative  
569 approach. *Eur Radiol.* 2015 Apr;25(4):932-9. doi: 10.1007/s00330-014-3487-0.

570 He J, Baxter SL, Xu J, Xu J, Zhou X, Zhang K. The practical implementation of artificial intelligence  
571 technologies in medicine. *Nat Med.* 2019 Jan;25(1):30-36. doi: 10.1038/s41591-018-0307-0.

572 Higgins J, Lasserson T, Chandler J, Tovey D, Thomas J, Flemyng E, Churchill R. Methodological  
573 Expectations of Cochrane Intervention Reviews (MECIR). Standards for the conduct and  
574 reporting of new Cochrane Intervention Reviews, reporting of protocols and the planning,  
575 conduct and reporting of updates. 2021.  
576 <https://community.cochrane.org/sites/default/files/uploads/MECIR-February-2021.pdf>.  
577 Accessed 12 November 2023.

578 Hughes A. ChatGPT: Everything you need to know about OpenAI's GPT-3 tool. *BBC Science Focus*  
579 *Magazine.* <https://www.sciencefocus.com/future-technology/gpt-3/>. 2023. Accessed 12  
580 November 2023.

581 Institute for Quality and Efficiency in Healthcare (IQWiG). *Allgemeine Methoden.* Version 6.1, from  
582 24<sup>th</sup> of January 2022. <https://www.iqwig.de/methoden/allgemeine-methoden-v6-1.pdf>.  
583 2022. Accessed 12 November 2023.

- 584 Jia LL, Zhao JX, Pan NN, Shi LY, Zhao LP, Tian JH, Huang G. Artificial intelligence model on chest  
585 imaging to diagnose COVID-19 and other pneumonias: A systematic review and meta-  
586 analysis. *Eur J Radiol Open*. 2022;9:100438. doi: 10.1016/j.ejro.2022.100438.
- 587 Jiang F, Jiang Y, Zhi H, Dong Y, Li H, Ma S, Wang Y, Dong Q, Shen H, Wang Y. Artificial intelligence in  
588 healthcare: past, present and future. *Stroke Vasc Neurol*. 2017 Jun 21;2(4):230-243. doi:  
589 10.1136/svn-2017-000101.
- 590 Jones OT, Matin RN, van der Schaar M, Prathivadi Bhayankaram K, Ranmuthu CKI, Islam MS, Behiyat  
591 D, Boscott R, Calanzani N, Emery J, Williams HC, Walter FM. Artificial intelligence and  
592 machine learning algorithms for early detection of skin cancer in community and primary  
593 care settings: a systematic review. *Lancet Digit Health*. 2022 Jun;4(6):e466-e476. doi:  
594 10.1016/S2589-7500(22)00023-1.
- 595 Kamel Rahimi A, Canfell OJ, Chan W, Sly B, Pole JD, Sullivan C, Shrapnel S. Machine learning models  
596 for diabetes management in acute care using electronic medical records: A systematic  
597 review. *Int J Med Inform*. 2022 Apr 2;162:104758. doi: 10.1016/j.ijmedinf.2022.104758.
- 598 Keane PA, Topol EJ. With an eye to AI and autonomous diagnosis. *NPJ Digit Med*. 2018 Aug 28;1:40.  
599 doi: 10.1038/s41746-018-0048-y.
- 600 Kung TH, Cheatham M, Medenilla A, Sillos C, De Leon L, Elepaño C, Madriaga M, Aggabao R, Diaz-  
601 Candido G, Maningo J, Tseng V. Performance of ChatGPT on USMLE: Potential for AI-assisted  
602 medical education using large language models. *PLOS Digit Health*. 2023 Feb  
603 9;2(2):e0000198. doi: 10.1371/journal.pdig.0000198.
- 604 Li Q, Zhao K, Bustamante CD, Ma X, Wong WH. Xrare: a machine learning method jointly modeling  
605 phenotypes and genetic evidence for rare disease diagnosis. *Genet Med*. 2019  
606 Sep;21(9):2126-2134. doi: 10.1038/s41436-019-0439-8.
- 607 Liu X, Cruz Rivera S, Moher D, Calvert MJ, Denniston AK; SPIRIT-AI and CONSORT-AI Working Group.  
608 Reporting guidelines for clinical trial reports for interventions involving artificial intelligence:  
609 the CONSORT-AI extension. *Nat Med*. 2020 Sep;26(9):1364-1374. doi: 10.1038/s41591-020-  
610 1034-x.
- 611 Liu X, Faes L, Kale AU, Wagner SK, Fu DJ, Bruynseels A, Mahendiran T, Moraes G, Shamdas M, Kern C,  
612 Ledsam JR, Schmid MK, Balaskas K, Topol EJ, Bachmann LM, Keane PA, Denniston AK. A  
613 comparison of deep learning performance against health-care professionals in detecting  
614 diseases from medical imaging: a systematic review and meta-analysis. *Lancet Digit Health*.  
615 2019 Oct;1(6):e271-e297. doi: 10.1016/S2589-7500(19)30123-2.
- 616 Mayring P. Qualitative Inhaltsanalyse. In: Mey G, Mruck K, editors. *Handbuch Qualitative Forschung*  
617 *in der Psychologie*. 2<sup>nd</sup> ed. Wiesbaden: Springer Fachmedien; 2020. p. 495-511.
- 618 McCarthy J, Minsky M, Rochester N, Shannon C. A proposal for the Dartmouth summer research  
619 project on artificial intelligence, August 31, 1955. *AI Magazine* 2006;27(4):12. doi:  
620 10.1609/aimag.v27i4.1904.
- 621 Mey G, Mruck K. Qualitative Interviews. In: Mey G, Mruck K, editors. *Handbuch Qualitative Forschung*  
622 *in der Psychologie*. 2<sup>nd</sup> ed. Wiesbaden: Springer Fachmedien; 2020. p. 315-336.
- 623 Moher D, Shamseer L, Clarke M, Ghersi D, Liberati A, Petticrew M, Shekelle P, Stewart LA. Preferred  
624 Reporting Items for Systematic Review and Meta-Analysis Protocols (PRISMA-P) 2015  
625 statement. *Syst Rev*. 2015;4(1):1. doi: 10.1609/aimag.v27i4.1904.
- 626 Nagendran M, Chen Y, Lovejoy CA, Gordon AC, Komorowski M, Harvey H, Topol EJ, Ioannidis JPA,  
627 Collins GS, Maruthappu M. Artificial intelligence versus clinicians: systematic review of  
628 design, reporting standards, and claims of deep learning studies. *BMJ*. 2020 Mar  
629 25;368:m689. doi: 10.1136/bmj.m689.
- 630 O'Brien BC, Harris IB, Beckman TJ, Reed DA, Cook DA. Standards for reporting qualitative research: a  
631 synthesis of recommendations. *Acad Med*. 2014 Sep;89(9):1245-51. doi:  
632 10.1097/ACM.0000000000000388.

- 633 OpenAI. Introducing ChatGPT. 2023. <https://openai.com/blog/chatgpt>. Accessed 12 November 2023.
- 634 Ouzzani M, Hammady H, Fedorowicz Z, Elmagarmid, A. Rayyan - a web and mobile app for systematic  
635 reviews. *Syst Rev* 5, 210 (2016). doi: 10.1186/s13643-016-0384-4.
- 636 Page MJ, McKenzie JE, Bossuyt PM, Boutron I, Hoffmann TC, Mulrow CD, Shamseer L, Tetzlaff JM, Akl  
637 EA, Brennan SE, Chou R, Glanville J, Grimshaw JM, Hróbjartsson A, Lalu MM, Li T, Loder EW,  
638 Mayo-Wilson E, McDonald S, McGuinness LA, Stewart LA, Thomas J, Tricco AC, Welch VA,  
639 Whiting P, Moher D. The PRISMA 2020 statement: an updated guideline for reporting  
640 systematic reviews. *BMJ*. 2021 Mar 29;372:n71. doi: 10.1136/bmj.n71.
- 641 Panch T, Mattie H, Celi LA. The "inconvenient truth" about AI in healthcare. *NPJ Digit Med*. 2019 Aug  
642 16;2:77. doi: 10.1038/s41746-019-0155-4.
- 643 Park Y, Jackson GP, Foreman MA, Gruen D, Hu J, Das AK. Evaluating artificial intelligence in medicine:  
644 phases of clinical research. *JAMIA Open*. 2020 Sep 8;3(3):326-331. doi:  
645 10.1093/jamiaopen/ooaa033.
- 646 Schreier M. Fallauswahl. In: Mey G, Mruck K, editors. *Handbuch Qualitative Forschung in der*  
647 *Psychologie*. 2<sup>nd</sup> ed. Wiesbaden: Springer Fachmedien; 2020. p. 19-39.
- 648 Schulz KF, Altman DG, Moher D; CONSORT Group. CONSORT 2010 statement: updated guidelines for  
649 reporting parallel group randomised trials. *BMJ*. 2010 Mar 23;340:c332. doi:  
650 10.1136/bmj.c332.
- 651 Shah NH, Milstein A, Bagley PhD SC. Making Machine Learning Models Clinically Useful. *JAMA*. 2019  
652 Oct 8;322(14):1351-1352. doi: 10.1001/jama.2019.10306.
- 653 Shen J, Zhang CJP, Jiang B, Chen J, Song J, Liu Z, He Z, Wong SY, Fang PH, Ming WK. Artificial  
654 Intelligence Versus Clinicians in Disease Diagnosis: Systematic Review. *JMIR Med Inform*.  
655 2019 Aug 16;7(3):e10010. doi: 10.2196/10010.
- 656 Silver D, Hubert T, Schrittwieser J, Antonoglou I, Lai M, Guez A, Lanctot M, Sifre L, Kumaran D,  
657 Graepel T, Lillicrap T, Simonyan K, Hassabis D. A general reinforcement learning algorithm  
658 that masters chess, shogi, and Go through self-play. *Science*. 2018 Dec 7;362(6419):1140-  
659 1144. doi: 10.1126/science.aar6404.
- 660 Sterne JAC, Hernán MA, Reeves BC, Savović J, Berkman ND, Viswanathan M, Henry D, Altman DG,  
661 Ansari MT, Boutron I, Carpenter JR, Chan AW, Churchill R, Deeks JJ, Hróbjartsson A, Kirkham  
662 J, Jüni P, Loke YK, Pigott TD, Ramsay CR, Regidor D, Rothstein HR, Sandhu L, Santaguida PL,  
663 Schünemann HJ, Shea B, Shrier I, Tugwell P, Turner L, Valentine JC, Waddington H, Waters E,  
664 Wells GA, Whiting PF, Higgins JP. ROBINS-I: a tool for assessing risk of bias in non-randomised  
665 studies of interventions. *BMJ*. 2016 Oct 12;355:i4919. doi: 10.1136/bmj.i4919.
- 666 Sterne JAC, Savović J, Page MJ, Elbers RG, Blencowe NS, Boutron I, Cates CJ, Cheng HY, Corbett MS,  
667 Eldridge SM, Emberson JR, Hernán MA, Hopewell S, Hróbjartsson A, Junqueira DR, Jüni P,  
668 Kirkham JJ, Lasserson T, Li T, McAleenan A, Reeves BC, Shepperd S, Shrier I, Stewart LA, Tilling  
669 K, White IR, Whiting PF, Higgins JPT. RoB 2: a revised tool for assessing risk of bias in  
670 randomised trials. *BMJ*. 2019 Aug 28;366:l4898. doi: 10.1136/bmj.l4898.
- 671 Xu HL, Gong TT, Liu FH, Chen HY, Xiao Q, Hou Y, Huang Y, Sun HZ, Shi Y, Gao S, Lou Y, Chang Q, Zhao  
672 YH, Gao QL, Wu QJ. Artificial intelligence performance in image-based ovarian cancer  
673 identification: A systematic review and meta-analysis. *EClinicalMedicine*. 2022 Sep  
674 17;53:101662. doi: 10.1016/j.eclinm.2022.101662.
- 675 Yu KH, Beam AL, Kohane IS. Artificial intelligence in healthcare. *Nat Biomed Eng*. 2018 Oct;2(10):719-  
676 731. doi: 10.1038/s41551-018-0305-z.
